# Supplementary material for: Enhanced hydriding–dehydriding performance of a 2LiH–MgB2 composite by the catalytic effects of Ni–B nanoparticles
Source: Royal Society of Chemistry journal article supplement (doi:10.1039/c3ta11600j), 2013-01-01
Supplement: c3ta11600j.pdf [file c3ta11600j.pdf]

## Supplementary Information:

### Enhanced hydriding-dehydriding performance of $2\text{LiH-MgB}_2$ composite by the catalytic effects of Ni-B nanoparticles

Jie Shao, Xuezhong Xiao, Lixin Chen<sup>\*</sup>, Xiulin Fan, Leyuan Han, Shouquan Li, Hongwei Ge, Qidong  
Wang

*Key Laboratory of Advanced Materials and Applications for Batteries of Zhejiang Province*

*Department of Materials Science and Engineering, Zhejiang University, Hangzhou 310027, China*

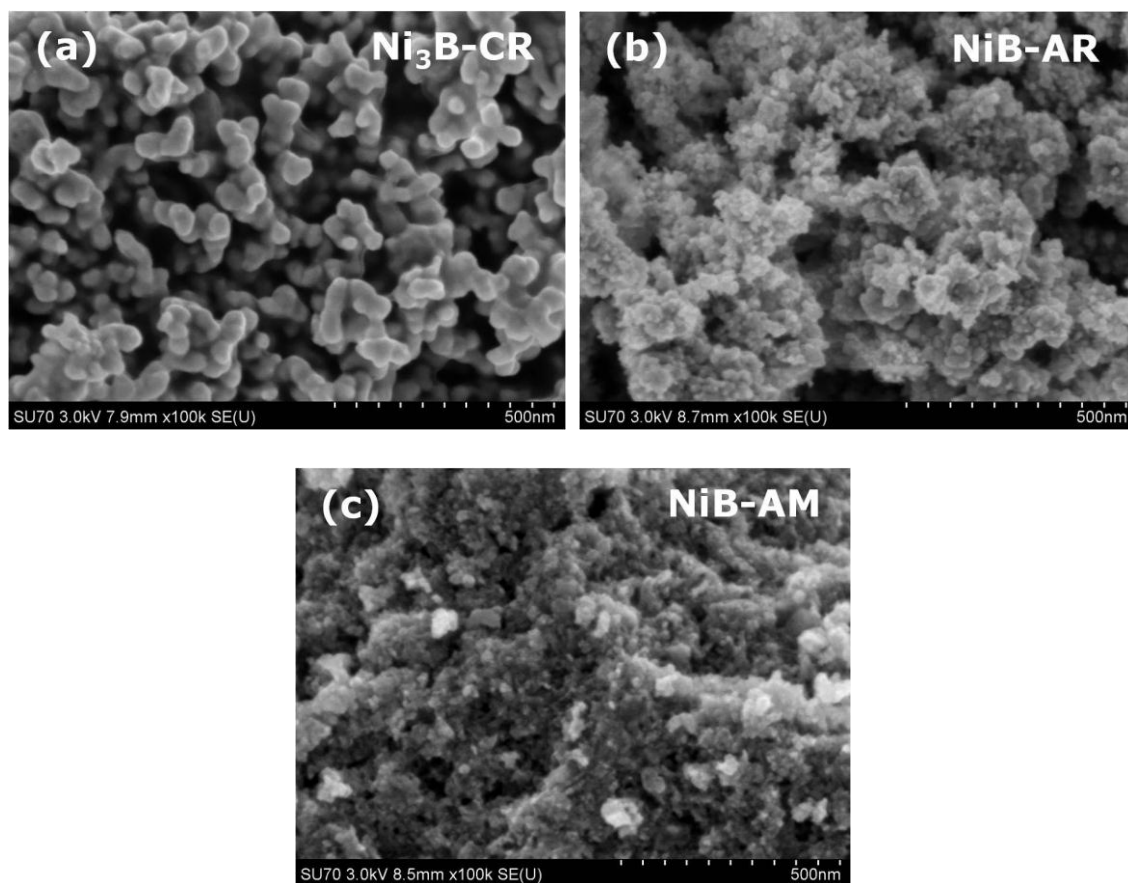

**Fig. S1** SEM images of as-prepared nanoparticles: (a)  $\text{Ni}_3\text{B-CR}$ , (b)  $\text{NiB-AR}$ , (c)  $\text{NiB-AM}$ .

<sup>\*</sup> Corresponding author. Tel./fax: +86 571 8795 1152.  
E-mail address: lxchen@zju.edu.cn (L.X. Chen).

**Table S1** The composition of as-prepared Ni-B nanoparticles.

| Sample               | Ni ( $\mu\text{g/mL}$ ) | B ( $\mu\text{g/mL}$ ) | Composition (at %)                   |
|----------------------|-------------------------|------------------------|--------------------------------------|
| Ni <sub>3</sub> B-CR | 32.38                   | 1.58                   | Ni <sub>77.7</sub> B <sub>22.3</sub> |
| NiB-AR               | 21.54                   | 2.65                   | Ni <sub>60.0</sub> B <sub>40.0</sub> |
| NiB-AM               | 18.71                   | 2.24                   | Ni <sub>60.6</sub> B <sub>39.4</sub> |

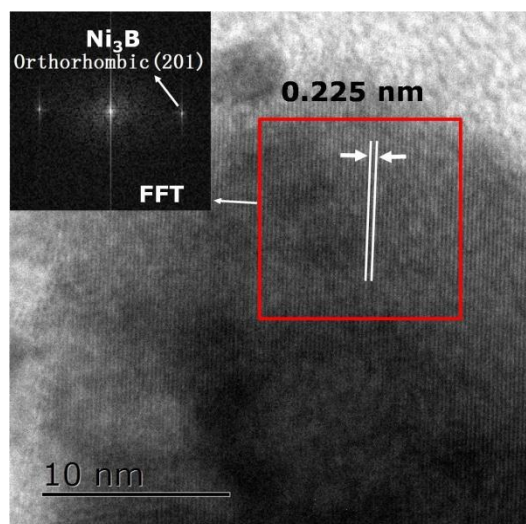

**Fig. S2** HRTEM Ni<sub>3</sub>B-CR with inset digitalized fast Fourier transform (FFT) image.

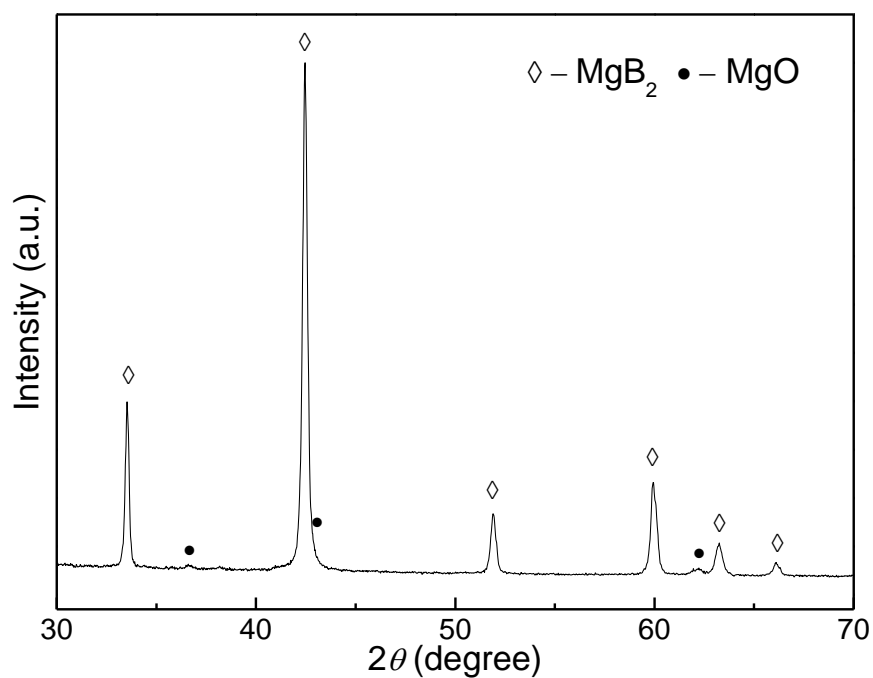

**Fig. S3** XRD pattern of as-purchased MgB<sub>2</sub> from Alfa Aesar.

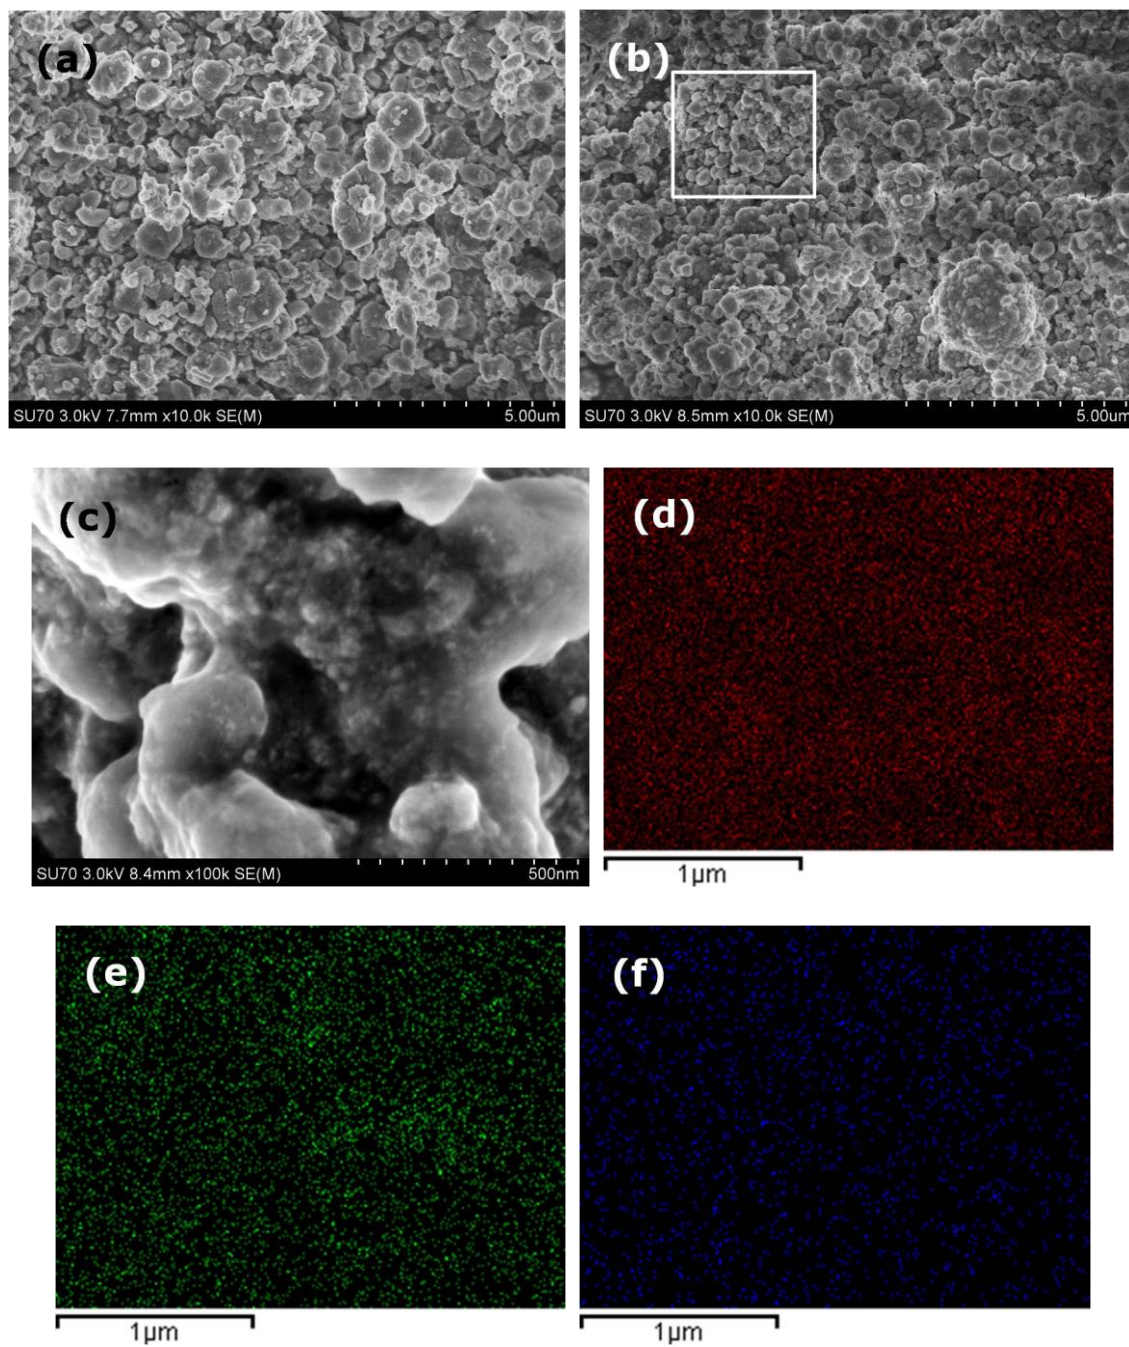

**Fig. S4** SEM images for as-milled  $2\text{LiH-MgB}_2$  samples doped with 10 wt% additives: (a) blank, (b, c) NiB-AM. The white rectangle in (b) highlights the scanned region of the EDX elemental maps of (d) Mg, (e) Ni and (f) B.

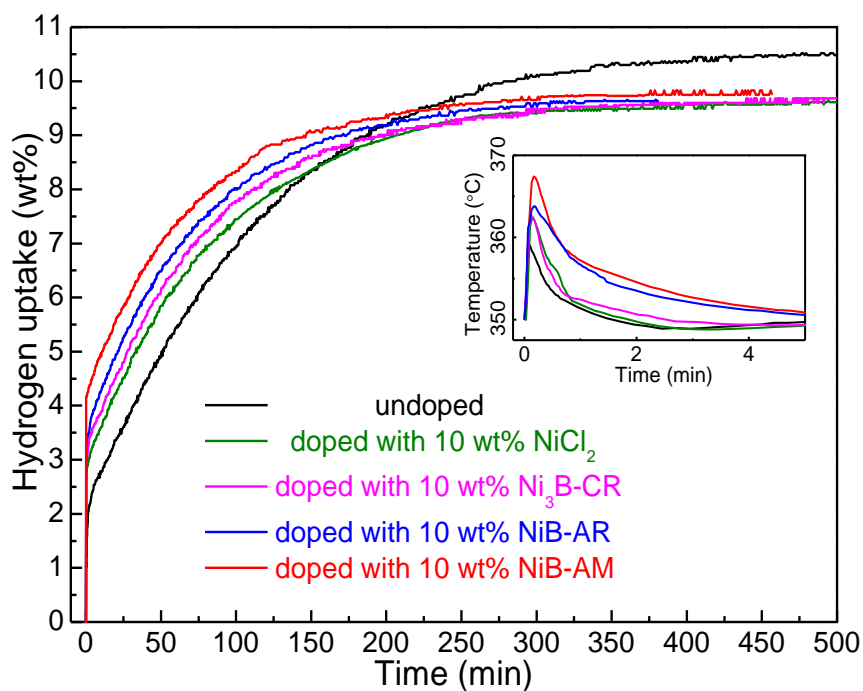

**Fig. S5** Isothermal hydrogenation curves of the as-milled 2LiH-MgB<sub>2</sub> samples under 100 bar H<sub>2</sub> at 350 °C, the inset shows the sudden change in temperature at the beginning of hydrogenation.

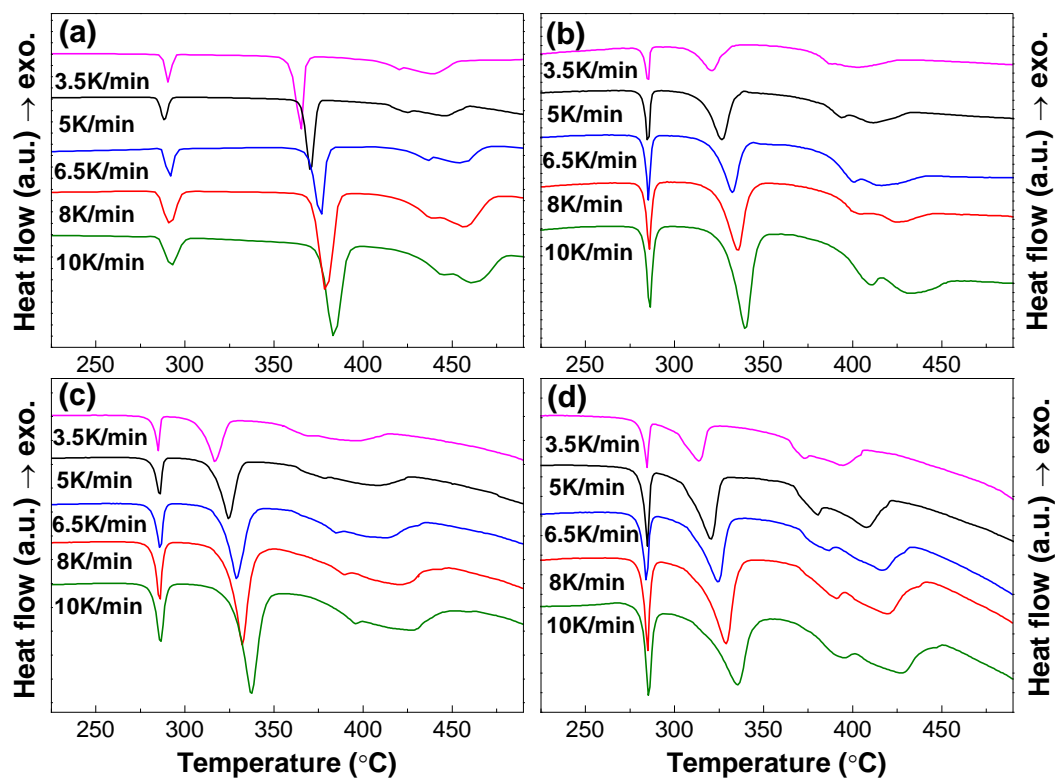

**Fig. S6** DSC curves of the hydrogenated 2LiH-MgB<sub>2</sub> samples at various heating rates: (a) undoped, (b) doped with 10 wt% NiCl<sub>2</sub>, (c) doped with 10 wt% Ni<sub>3</sub>B-CR, (d) doped with 10 wt% NiB-AM.
